# Supplementary material for: Factors associated with foot ulceration and amputation in adults on dialysis: a cross-sectional observational study
Source: PubMed Central journal article supplement (PMC5591526; doi:10.1186/s12882-017-0711-6), 2017-09-08
Supplement: 12882_2017_711_MOESM4_ESM.pdf [file 12882_2017_711_MOESM4_ESM.pdf]

## Factors associated with foot ulceration and amputation in adults on dialysis: a cross-sectional observational study

Michelle R Kaminski, Anita Raspovic, Lawrence P McMahon, Katrina A Lambert, Bircan Erbas, Peter F Mount, Peter G Kerr, Karl B Landorf

### Additional File 4 Comparisons between participants with and without diabetes

**Additional Table 1 Foot complications in participants *with* current foot ulceration and/or amputation – data are *n* (%), unless otherwise stated**

|                                                        | Foot ulceration   |                      |                        |          | Amputation        |                      |                        |          |
|--------------------------------------------------------|-------------------|----------------------|------------------------|----------|-------------------|----------------------|------------------------|----------|
|                                                        | Total<br>(n = 45) | Diabetes<br>(n = 39) | No diabetes<br>(n = 6) | P-value* | Total<br>(n = 46) | Diabetes<br>(n = 43) | No diabetes<br>(n = 3) | P-value* |
| Previous foot ulceration                               | 32 (71.1)         | 30 (76.9)            | 2 (33.3)               | 0.087    | 44 (95.7)         | 41 (95.3)            | 3 (100)                | 1.00     |
| Current foot ulceration                                | 45 (100.0)        | 39 (100.0)           | 6 (100.0)              | N/A†     | 26 (56.5)         | 24 (55.8)            | 1 (33.3)               | 1.00     |
| Previous lower extremity amputation                    | 26 (57.8)         | 24 (61.5)            | 2 (33.3)               | 0.39     | 46 (100)          | 43 (100)             | 3 (100)                | N/A†     |
| Minor                                                  | 22 (48.9)         | 20 (51.3)            | 2 (33.3)               | 0.70     | 39 (84.8)         | 36 (83.7)            | 3 (100)                | 1.00     |
| Major                                                  | 8 (17.8)          | 8 (20.5)             | 0 (0)                  | 0.52     | 12 (26.1)         | 12 (27.9)            | 0 (0)                  | 0.70     |
| Combination                                            | 4 (8.9)           | 4 (10.3)             | 0 (0)                  | 0.96     | 5 (10.9)          | 5 (11.6)             | 0 (0)                  | 1.00     |
| Peripheral neuropathy                                  | 43 (95.6)         | 38 (97.4)            | 5 (83.3)               | 0.62     | 44 (95.7)         | 42 (97.7)            | 2 (66.7)               | 0.28     |
| Peripheral arterial disease                            | 42 (93.3)         | 36 (92.3)            | 6 (100.0)              | 1.00     | 39 (84.8)         | 37 (86.0)            | 2 (66.7)               | 0.94     |
| Arterial calcification                                 | 20 (44.4)         | 18 (46.2)            | 2 (33.3)               | 0.88     | 21 (45.7)         | 20 (46.5)            | 1 (33.3)               | 1.00     |
| Foot deformity                                         | 39 (86.7)         | 33 (84.6)            | 6 (100.0)              | 0.70     | 42 (91.3)         | 39 (90.7)            | 3 (100)                | 1.00     |
| Limited range of motion of first MTPJ‡                 | 39 (86.7)         | 34 (87.2)            | 5 (83.3)               | N/A†     | 38 (82.6)         | 36 (83.7)            | 2 (66.7)               | N/A†     |
| Mean peak plantar pressures (SD), kg/cm <sup>2</sup> ‡ |                   |                      |                        |          |                   |                      |                        |          |
| Total left foot                                        | 2.05 (0.53)       | 2.08 (0.52)          | 1.84 (0.61)            | 0.57     | 2.06 (0.37)       | 2.07 (0.37)          | 1.70§                  | 0.33     |
| Total right foot                                       | 2.13 (0.55)       | 2.15 (0.56)          | 1.99 (0.53)            | 0.67     | 2.13 (0.50)       | 2.18 (0.46)          | 1.04§                  | 0.023*   |
| Skin pathology                                         | 42 (93.3)         | 37 (94.9)            | 5 (83.3)               | 0.86     | 43 (93.5)         | 40 (93.0)            | 3 (100)                | 1.00     |
| Nail pathology                                         | 37 (82.2)         | 32 (82.1)            | 5 (83.3)               | 1.00     | 34 (73.9)         | 33 (76.7)            | 1 (33.3)               | 0.33     |
| Inappropriate footwear                                 | 25 (55.6)         | 20 (51.3)            | 5 (83.3)               | 0.30     | 21 (45.7)         | 20 (46.5)            | 1 (33.3)               | 1.00     |

|                                            |           |           |          |      |           |           |          |      |
|--------------------------------------------|-----------|-----------|----------|------|-----------|-----------|----------|------|
| Poor foot-health care                      | 10 (22.2) | 9 (23.1)  | 1 (16.7) | 1.00 | 7 (15.2)  | 7 (16.3)  | 0 (0)    | 1.00 |
| Podiatry attendance, <i>last 12 months</i> | 36 (80.0) | 31 (79.5) | 5 (83.3) | 1.00 | 36 (78.3) | 34 (79.1) | 2 (66.7) | 1.00 |

\*Significant difference between 'diabetes' and 'no diabetes' groups,  $p < 0.05$ . N/A = Not applicable. †Unable to calculate p-value due to limited number of cases. MTPJ = Metatarsophalangeal joint. ‡For foot ulceration, maximum missing data were for left peak plantar pressure involving 17 participants overall (37.8%) – missing data were for limited range of motion of first MTPJ (left, n = 16; right, n = 9) and peak plantar pressures (left, n = 17; right, n = 16). For amputation, maximum missing data were for left limited range of motion of first MTPJ involving 25 participants overall (54.3%) – missing data were for limited range of motion of first MTPJ (left, n = 25; right, n = 14) and peak plantar pressures (left, n = 22; right, n = 21). §Exact value recoded as only one participant.

**Additional Table 2 Foot complications in participants *without* current foot ulceration and/or amputation – data are *n* (%), unless otherwise stated**

|                                                              | No foot ulceration |                       |                          |          | No amputation      |                       |                          |          |
|--------------------------------------------------------------|--------------------|-----------------------|--------------------------|----------|--------------------|-----------------------|--------------------------|----------|
|                                                              | Total<br>(n = 405) | Diabetes<br>(n = 187) | No diabetes<br>(n = 218) | P-value* | Total<br>(n = 404) | Diabetes<br>(n = 183) | No diabetes<br>(n = 221) | P-value* |
| Previous foot ulceration                                     | 65 (16.0)          | 45 (24.1)             | 20 (9.2)                 | <0.001*  | 53 (13.1)          | 34 (18.6)             | 19 (8.6)                 | 0.005*   |
| Current foot ulceration                                      | N/A                | N/A                   | N/A                      | N/A      | 19 (4.7)           | 15 (8.2)              | 4 (1.8)                  | 0.005*   |
| Previous lower extremity amputation                          | 20 (4.9)           | 19 (10.2)             | 1 (0.5)                  | <0.001*  | N/A                | N/A                   | N/A                      | N/A      |
| Minor                                                        | 17 (4.2)           | 16 (8.6)              | 1 (0.5)                  | <0.001*  |                    |                       |                          |          |
| Major                                                        | 4 (1.0)            | 4 (2.1)               | 0 (0)                    | 0.096    |                    |                       |                          |          |
| Combination                                                  | 1 (0.2)            | 1 (0.5)               | 0 (0)                    | 0.94     |                    |                       |                          |          |
| Peripheral neuropathy                                        | 185 (45.7)         | 111 (59.4)            | 74 (33.9)                | <0.001*  | 184 (45.5)         | 107 (58.5)            | 77 (34.8)                | <0.001*  |
| Peripheral arterial disease                                  | 194 (47.9)         | 113 (60.4)            | 81 (37.2)                | <0.001*  | 197 (48.8)         | 112 (61.2)            | 85 (38.5)                | <0.001*  |
| Arterial calcification                                       | 164 (40.5)         | 87 (46.5)             | 77 (35.3)                | 0.029*   | 163 (40.3)         | 85 (46.4)             | 78 (35.3)                | 0.030*   |
| Foot deformity                                               | 302 (74.6)         | 141 (75.4)            | 161 (73.9)               | 0.81     | 299 (74.0)         | 135 (73.8)            | 164 (74.2)               | 1.00     |
| Limited range of motion of first MTPJ†                       | 382 (94.3)         | 184 (98.4)            | 198 (90.8)               | <0.001*  | 383 (94.8)         | 182 (99.5)            | 201 (91.0)               | <0.001*  |
| Mean peak plantar pressures (SD), <i>kg/cm<sup>2</sup></i> † |                    |                       |                          |          |                    |                       |                          |          |
| Total left foot                                              | 1.84 (0.57)        | 1.92 (0.58)           | 1.77 (0.55)              | 0.012*   | 1.84 (0.58)        | 1.93 (0.60)           | 1.77 (0.55)              | 0.012*   |
| Total right foot                                             | 1.85 (0.61)        | 1.93 (0.56)           | 1.79 (0.64)              | 0.035*   | 1.86 (0.61)        | 1.93 (0.57)           | 1.80 (0.64)              | 0.048*   |
| Skin pathology                                               | 353 (87.2)         | 165 (88.2)            | 188 (86.2)               | 0.65     | 352 (87.1)         | 162 (88.5)            | 190 (86.0)               | 0.54     |
| Nail pathology                                               | 282 (69.6)         | 144 (77.0)            | 138 (63.3)               | 0.004*   | 285 (70.5)         | 143 (78.1)            | 142 (64.3)               | 0.003*   |
| Inappropriate footwear                                       | 272 (67.2)         | 131 (70.1)            | 141 (64.7)               | 0.30     | 276 (68.3)         | 131 (71.6)            | 145 (65.6)               | 0.24     |
| Poor foot-health care                                        | 126 (31.1)         | 39 (20.9)             | 87 (39.9)                | <0.001*  | 129 (31.9)         | 41 (22.4)             | 88 (39.8)                | <0.001*  |
| Podiatry attendance, <i>last 12 months</i>                   | 187 (46.2)         | 122 (65.2)            | 65 (29.8)                | <0.001*  | 187 (46.3)         | 119 (65.0)            | 68 (30.8)                | <0.001*  |

\*Significant difference between ‘diabetes’ and ‘no diabetes’ groups,  $p < 0.05$ . N/A = Not applicable. MTPJ = Metatarsophalangeal joint. †For foot ulceration, maximum missing data were for peak plantar pressures involving 39 participants overall (9.6%) – missing data were for limited range of motion of first MTPJ (left,  $n = 9$ ; right,  $n = 6$ ) and peak plantar pressures (left,  $n = 39$ ; right,  $n = 39$ ). For amputation, maximum missing data were for peak plantar pressures involving 34 participants overall (8.4%) – missing data were for limited range of motion of first MTPJ (right,  $n = 1$ ) and peak plantar pressures (left,  $n = 34$ ; right,  $n = 34$ ).
