# Supplementary material for: Factors associated with foot ulceration and amputation in adults on dialysis: a cross-sectional observational study
Source: PubMed Central journal article supplement (PMC5591526; doi:10.1186/s12882-017-0711-6), 2017-09-08
Supplement: 12882_2017_711_MOESM6_ESM.pdf [file 12882_2017_711_MOESM6_ESM.pdf]

## Factors associated with foot ulceration and amputation in adults on dialysis: a cross-sectional observational study

Michelle R Kaminski, Anita Raspovic, Lawrence P McMahon, Katrina A Lambert, Bircan Erbas, Peter F Mount, Peter G Kerr, Karl B Landorf

### Additional File 6 Univariate analyses for factors associated with foot ulceration and lower extremity amputation

**Additional Table 1 Univariate analysis for factors associated with *foot ulceration* – data are *n* (%), unless otherwise stated**

| Risk Factor                                  | Foot ulceration        |                        | Univariate logistic regression analysis |                |          |
|----------------------------------------------|------------------------|------------------------|-----------------------------------------|----------------|----------|
|                                              | Yes                    | No                     | OR                                      | 95% CI         | P-value* |
| <i>n</i>                                     | 45                     | 405                    |                                         |                |          |
| Mean age (SD), years                         | 69.0 (10.3)            | 67.3 (13.5)            | 1.01                                    | 0.99 to 1.04   | 0.43     |
| Male sex                                     | 36 (80.0)              | 255 (63.0)             | 2.35                                    | 1.10 to 5.02   | 0.027*   |
| Mean body mass index (SD), kg/m <sup>2</sup> | 29.1 (6.5)             | 28.1 (6.6)             | 1.02                                    | 0.98 to 1.07   | 0.30     |
| Current smoking                              | 5 (11.1)               | 49 (12.1)              | 0.91                                    | 0.34 to 2.41   | 0.85     |
| Living alone                                 | 6 (13.3)               | 69 (17.0)              | 0.75                                    | 0.31 to 1.84   | 0.53     |
| Median duration of dialysis (IQR), months    | 37.5 (20.0 to 64.1)    | 36.8 (16.5 to 71.8)    | 1.00                                    | 1.00 to 1.00   | 0.88     |
| Diabetes mellitus                            | 39 (86.7)              | 187 (46.2)             | 7.58                                    | 3.14 to 18.30  | <0.001*  |
| Mean diabetes duration (SD), months          | 348.8 (167.6)          | 237.0 (142.3)          | 1.01                                    | 1.00 to 1.01   | <0.001*  |
| Retinopathy                                  | 28 (62.2)              | 104 (25.7)             | 0.21                                    | 0.11 to 0.40   | <0.001*  |
| Peripheral neuropathy                        | 43 (95.6)              | 185 (45.7)             | 0.04                                    | 0.01 to 0.16   | <0.001*  |
| Peripheral arterial disease                  | 42 (93.3)              | 194 (47.9)             | 15.23                                   | 4.64 to 49.92  | <0.001*  |
| Arterial calcification                       | 20 (44.4)              | 164 (40.5)             | 1.18                                    | 0.63 to 2.19   | 0.61     |
| Hypertension (requiring medication)          | 36 (80.0)              | 324 (80.0)             | 1.00                                    | 0.46 to 2.16   | 1.00     |
| Dyslipidemia                                 | 38 (84.4)              | 263 (64.9)             | 2.93                                    | 1.28 to 6.73   | 0.011*   |
| Ischemic heart disease                       | 36 (80.0)              | 227 (56.0)             | 3.14                                    | 1.47 to 6.68   | 0.003*   |
| Congestive cardiac failure                   | 18 (40.0)              | 104 (25.7)             | 1.93                                    | 1.02 to 3.65   | 0.043*   |
| Cerebrovascular disease                      | 19 (42.2)              | 85 (21.0)              | 2.75                                    | 1.45 to 5.21   | 0.002*   |
| Osteoarthritis                               | 17 (37.8)              | 175 (43.2)             | 0.80                                    | 0.42 to 1.50   | 0.49     |
| Inflammatory arthritis                       | 14 (31.1)              | 169 (41.7)             | 0.63                                    | 0.33 to 1.22   | 0.172    |
| Median C-reactive protein (SD), mg/L†        | 10.00 (4.82 to 43.83)  | 6.95 (2.67 to 18.08)   | 1.01                                    | 1.00 to 1.02   | 0.058    |
| Mean serum albumin (SD), g/L                 | 31.12 (4.76)           | 34.01 (3.74)           | 0.84                                    | 0.78 to 0.90   | <0.001*  |
| Mean total calcium (SD), mmol/L              | 2.15 (0.13)            | 2.20 (0.14)            | 0.06                                    | 0.01 to 0.53   | 0.011*   |
| Mean phosphate (SD), mmol/L                  | 1.64 (0.39)            | 1.54 (0.38)            | 1.81                                    | 0.86 to 3.82   | 0.120    |
| Median parathyroid hormone (SD), pmol/L      | 28.03 (20.70 to 43.02) | 29.77 (17.38 to 46.25) | 0.99                                    | 0.98 to 1.01   | 0.36     |
| Mean glycated hemoglobin (SD), %†            | 6.89 (1.24)            | 6.05 (1.29)            | 1.51                                    | 1.22 to 1.86   | <0.001*  |
| Mean hemoglobin (SD), g/L                    | 107.56 (10.62)         | 110.02 (15.22)         | 0.99                                    | 0.97 to 1.01   | 0.30     |
| Mean SF-36v2® PCS (SD)                       | 33.08 (8.92)           | 38.71 (10.74)          | 0.95                                    | 0.92 to 0.98   | 0.001*   |
| Mean SF-36v2® MCS (SD)                       | 47.08 (13.96)          | 48.71 (11.09)          | 0.99                                    | 0.96 to 1.01   | 0.36     |
| Previous foot ulceration                     | 32 (71.1)              | 65 (16.0)              | 12.88                                   | 6.41 to 25.85  | <0.001*  |
| Previous amputation                          | 26 (57.8)              | 20 (4.9)               | 26.34                                   | 12.53 to 55.38 | <0.001*  |
| Foot deformity                               | 39 (86.7)              | 302 (74.6)             | 2.22                                    | 0.91 to 5.39   | 0.079    |

|                                                             |             |             |      |              |         |
|-------------------------------------------------------------|-------------|-------------|------|--------------|---------|
| Limited range of motion of first MTPJ†‡                     | 39 (86.7)   | 382 (94.3)  | N/A  | N/A          | N/A     |
| Mean peak plantar pressure (SD), <i>kg/cm<sup>2</sup></i> † |             |             |      |              |         |
| Total left foot                                             | 2.05 (0.53) | 1.84 (0.57) | 1.69 | 0.98 to 2.89 | 0.057   |
| Total right foot                                            | 2.13 (0.55) | 1.85 (0.61) | 1.72 | 1.08 to 2.75 | 0.023*  |
| Skin pathology                                              | 42 (93.3)   | 353 (87.2)  | 2.06 | 0.62 to 6.90 | 0.24    |
| Nail pathology                                              | 37 (82.2)   | 282 (69.6)  | 2.02 | 0.91 to 4.46 | 0.083   |
| Inappropriate/ill-fitting footwear                          | 25 (55.6)   | 272 (67.2)  | 0.61 | 0.33 to 1.14 | 0.122   |
| Poor foot health care                                       | 10 (22.2)   | 126 (31.1)  | 0.63 | 0.30 to 1.32 | 0.22    |
| Podiatry attendance, <i>last 12 months</i>                  | 36 (80.0)   | 187 (46.2)  | 4.66 | 2.19 to 9.93 | <0.001* |

OR = Odds ratio. CI = Confidence interval. \*Significant association,  $p < 0.05$ . SD = Standard deviation. IQR = Interquartile range. †Maximum missing data were for left peak plantar pressure involving 56 participants overall (12.4%). Missing data were for glycated hemoglobin ( $n = 39$ ), C-reactive protein ( $n = 3$ ), limited range of motion of first MTPJ (left,  $n = 25$ ; right,  $n = 15$ ) and peak plantar pressures (left,  $n = 56$ ; right,  $n = 55$ ). SF-36v2<sup>®</sup> = Short-Form-36 Version 2. PCS = Physical component score. MCS = Mental component score. MTPJ = Metatarsophalangeal joint. ‡As limited first MTPJ range of motion was present in the majority of the sample and in all participants with foot ulceration, this variable was removed from the analysis. N/A = Not applicable.

**Additional Table 2 Univariate analysis for factors associated with lower extremity amputation – data are *n* (%), unless otherwise stated**

| Risk Factor                                           | Lower extremity amputation |                        | Univariate logistic regression analysis |                 |          |
|-------------------------------------------------------|----------------------------|------------------------|-----------------------------------------|-----------------|----------|
|                                                       | Yes                        | No                     | OR                                      | 95% CI          | P-value* |
| <i>n</i>                                              | 46                         | 404                    |                                         |                 |          |
| Mean age (SD), years                                  | 65.4 (11.23)               | 67.7 (13.4)            | 0.99                                    | 0.97 to 1.01    | 0.25     |
| Male sex                                              | 37 (80.4)                  | 254 (62.9)             | 2.43                                    | 1.14 to 5.17    | 0.021*   |
| Mean body mass index (SD), kg/m <sup>2</sup>          | 30.4 (6.3)                 | 27.9 (6.6)             | 1.05                                    | 1.01 to 1.10    | 0.015*   |
| Current smoking                                       | 5 (10.9)                   | 49 (12.1)              | 1.13                                    | 0.43 to 3.00    | 0.80     |
| Living alone                                          | 10 (21.7)                  | 65 (16.1)              | 1.45                                    | 0.69 to 3.06    | 0.33     |
| Median duration of dialysis (IQR), months             | 38.3 (17.7 to 72.6)        | 36.6 (16.6 to 69.5)    | 1.00                                    | 1.00 to 1.01    | 0.92     |
| Diabetes mellitus                                     | 43 (93.5)                  | 183 (45.3)             | 17.31                                   | 5.28 to 56.71   | <0.001*  |
| Mean diabetes duration (SD), months                   | 301.8 (163.1)              | 245.6 (148.5)          | 1.00                                    | 1.00 to 1.00    | 0.032*   |
| Retinopathy                                           | 32 (69.6)                  | 100 (24.8)             | 6.95                                    | 3.57 to 13.55   | <0.001*  |
| Peripheral neuropathy                                 | 44 (95.7)                  | 184 (45.5)             | 26.30                                   | 6.29 to 109.98  | <0.001*  |
| Peripheral arterial disease                           | 39 (84.8)                  | 197 (48.8)             | 5.85                                    | 2.56 to 13.40   | <0.001*  |
| Arterial calcification                                | 21 (45.7)                  | 163 (40.3)             | 1.24                                    | 0.67 to 2.29    | 0.49     |
| Hypertension (requiring medication)                   | 40 (87.0)                  | 320 (79.2)             | 1.75                                    | 0.72 to 4.27    | 0.22     |
| Dyslipidemia                                          | 39 (84.8)                  | 262 (64.9)             | 3.02                                    | 1.32 to 6.93    | 0.009*   |
| Ischemic heart disease                                | 33 (71.7)                  | 230 (56.9)             | 1.92                                    | 0.98 to 3.76    | 0.057    |
| Congestive cardiac failure                            | 15 (32.6)                  | 107 (26.5)             | 1.34                                    | 0.70 to 2.59    | 0.38     |
| Cerebrovascular disease                               | 15 (32.6)                  | 89 (22.0)              | 1.71                                    | 0.89 to 3.31    | 0.110    |
| Osteoarthritis                                        | 15 (32.6)                  | 177 (43.8)             | 0.62                                    | 0.33 to 1.19    | 0.148    |
| Inflammatory arthritis                                | 13 (28.3)                  | 170 (42.1)             | 0.54                                    | 0.28 to 1.06    | 0.074    |
| Median C-reactive protein (SD), mg/L†                 | 10.89 (4.44 to 36.88)      | 6.90 (2.67 to 18.50)   | 1.01                                    | 1.00 to 1.02    | 0.007*   |
| Mean serum albumin (SD), g/L                          | 32.50 (4.32)               | 33.86 (3.88)           | 0.92                                    | 0.85 to 0.99    | 0.026*   |
| Mean total calcium (SD), mmol/L                       | 2.21 (0.12)                | 2.20 (0.14)            | 1.55                                    | 0.17 to 14.62   | 0.70     |
| Mean phosphate (SD), mmol/L                           | 1.59 (0.41)                | 1.55 (0.38)            | 1.30                                    | 0.60 to 2.81    | 0.50     |
| Median parathyroid hormone (SD), pmol/L               | 28.52 (21.56 to 50.24)     | 29.65 (17.38 to 45.43) | 1.00                                    | 0.99 to 1.01    | 0.77     |
| Mean glycated hemoglobin (SD), %†                     | 6.98 (1.36)                | 6.03 (1.27)            | 1.58                                    | 1.29 to 1.95    | <0.001*  |
| Mean hemoglobin (SD), g/L                             | 107.56 (10.62)             | 110.02 (15.22)         | 0.99                                    | 0.97 to 1.01    | 0.30     |
| Mean SF-36v2® PCS (SD)                                | 33.16 (9.93)               | 38.71 (10.65)          | 0.95                                    | 0.93 to 0.98    | 0.001*   |
| Mean SF-36v2® MCS (SD)                                | 47.11 (13.56)              | 48.71 (11.14)          | 0.99                                    | 0.96 to 1.01    | 0.37     |
| Previous foot ulceration                              | 44 (95.7)                  | 53 (13.1)              | 145.70                                  | 34.31 to 618.77 | <0.001*  |
| Current foot ulceration                               | 26 (56.5)                  | 19 (4.7)               | 26.34                                   | 12.53 to 55.38  | <0.001*  |
| Foot deformity                                        | 42 (91.3)                  | 299 (74.0)             | 3.69                                    | 1.29 to 10.53   | 0.015*   |
| Limited range of motion of first MTPJ†‡               | 38 (82.6)                  | 383 (94.8)             | N/A                                     | N/A             | N/A      |
| Mean peak plantar pressure (SD), kg/cm <sup>2</sup> † |                            |                        |                                         |                 |          |
| Total left foot                                       | 2.06 (0.37)                | 1.84 (0.58)            | 1.68                                    | 0.95 to 2.98    | 0.075    |
| Total right foot                                      | 2.13 (0.50)                | 1.86 (0.61)            | 1.70                                    | 1.04 to 2.78    | 0.036*   |
| Skin pathology                                        | 43 (93.5)                  | 352 (87.1)             | 2.12                                    | 0.63 to 7.07    | 0.22     |
| Nail pathology                                        | 34 (73.9)                  | 285 (70.5)             | 1.18                                    | 0.59 to 2.36    | 0.63     |
| Inappropriate/ill-fitting footwear                    | 21 (45.7)                  | 276 (68.3)             | 0.39                                    | 0.21 to 0.72    | 0.003*   |
| Poor foot health care                                 | 7 (15.2)                   | 129 (31.9)             | 0.38                                    | 0.17 to 0.88    | 0.024*   |
| Podiatry attendance, last 12 months                   | 36 (78.3)                  | 187 (46.3)             | 4.18                                    | 2.02 to 8.65    | <0.001*  |

OR = Odds ratio. CI = Confidence interval. \*Significant association,  $p < 0.05$ . SD = Standard deviation. IQR = Interquartile range. †Maximum missing data were for left peak plantar pressure involving 56 participants overall (12.4%). Missing data were for glycated hemoglobin (n = 39), C-reactive protein (n = 3), limited range of motion of first MTPJ (left, n = 25; right, n = 15) and peak plantar pressures (left, n = 56; right, n = 55). SF-36v2® = Short-Form-36 Version 2. PCS = Physical component score. MCS = Mental component score. MTPJ = Metatarsophalangeal joint. ‡As limited first MTPJ range of motion was present in the majority of the sample and in all participants with amputation, this variable was removed from the analysis. N/A = Not applicable.
