# Supplementary material for: Factors associated with foot ulceration and amputation in adults on dialysis: a cross-sectional observational study
Source: Springer Nature journal article supplement (doi:10.1186/s12882-017-0711-6), 2017-09-08
Supplement: MOESM1 [file 15032052]

## Factors associated with foot ulceration and amputation in adults on dialysis: a cross-sectional observational study

Michelle R Kaminski, Anita Raspovic, Lawrence P McMahon, Katrina A Lambert, Bircan Erbas, Peter F Mount, Peter G Kerr, Karl B Landorf

---

### Additional File 1 Intra-examiner reliability

Reliability statistics for intra-examiner comparisons for the monofilament test and palpation of pedal pulses are shown in Additional Table 1. Linear weighted kappa values equaled 1.0 (95% confidence interval, CI, 1.0 to 1.0) for all variables, indicating excellent levels of agreement. Absolute percentage of agreement ranged from 95 to 100%.

### Additional Table 1 Intra-examiner reliability for dichotomous data

|                     | Linear weighted kappa | 95% CI       | Absolute % agreement | Interpretation*     |
|---------------------|-----------------------|--------------|----------------------|---------------------|
| <b>Monofilament</b> |                       |              |                      |                     |
| Left                | 1.00                  | 1.00 to 1.00 | 95                   | Excellent agreement |
| Right               | 1.00                  | 1.00 to 1.00 | 95                   | Excellent agreement |
| <b>Pedal pulses</b> |                       |              |                      |                     |
| Left                | 1.00                  | 1.00 to 1.00 | 95                   | Excellent agreement |
| Right               | 1.00                  | 1.00 to 1.00 | 100                  | Excellent agreement |

CI = Confidence interval. \*Weighted kappa values >0.8 represent excellent agreement, >0.6 substantial levels of agreement, 0.4 to 0.6 moderate agreement and <0.4 poor to fair agreement.

Reliability statistics for intra-examiner comparisons for the vibration perception threshold, ankle-brachial pressure index, toe-brachial pressure index and range of motion of the first metatarsophalangeal joint were found to have good reliability and are shown in Additional Table 2. The 95% limits of agreement ranged between -4.21 to 4.72. Intra-class correlations coefficients (ICCs) and corresponding 95% confidence intervals (CIs) for the continuous variables (left and right, respectively) were: 0.99 (95% CI, 0.98 to 1.00) and 0.99 (95% CI, 0.97 to 1.00) for vibration perception threshold, 0.95 (0.87 to 0.98) and 0.91 (0.79 to 0.96) for ankle brachial pressure index, 0.87 (0.70 to 0.95) and 0.88 (0.72 to 0.95) for toe-brachial

pressure index, and 0.99 (0.97 to 0.99) and 0.99 (0.98 to 1.00) for first metatarsophalangeal joint range of motion.

**Additional Table 2 Intra-examiner reliability for continuous data**

|                                              | ICC  | 95% CI       | 95% LOA       | Interpretation*  |
|----------------------------------------------|------|--------------|---------------|------------------|
| <b>Vibration perception threshold</b>        |      |              |               |                  |
| Left                                         | 0.99 | 0.98 to 1.00 | -2.89 to 3.51 | Good reliability |
| Right                                        | 0.99 | 0.97 to 1.00 | -4.21 to 4.72 | Good reliability |
| <b>Ankle-brachial pressure index</b>         |      |              |               |                  |
| Left                                         | 0.95 | 0.87 to 0.98 | -0.16 to 0.18 | Good reliability |
| Right                                        | 0.91 | 0.79 to 0.96 | -0.17 to 0.24 | Good reliability |
| <b>Toe-brachial pressure index</b>           |      |              |               |                  |
| Left                                         | 0.87 | 0.70 to 0.95 | -0.18 to 0.15 | Good reliability |
| Right                                        | 0.88 | 0.72 to 0.95 | -0.17 to 0.14 | Good reliability |
| <b>Range of motion (1<sup>st</sup> MTPJ)</b> |      |              |               |                  |
| Left                                         | 0.99 | 0.97 to 0.99 | -2.57 to 3.50 | Good reliability |
| Right                                        | 0.99 | 0.98 to 1.00 | -2.53 to 2.33 | Good reliability |

ICC = Intra-class correlation coefficient. CI = Confidence interval. LOA = Limits of agreement. \*ICC values >0.75 indicate good reliability, ICCs ranging from 0.50 to 0.75 imply moderate reliability and ICCs <0.50 suggest poor reliability. MTPJ = Metatarsophalangeal joint.
