# Supplementary material for: Factors associated with foot ulceration and amputation in adults on dialysis: a cross-sectional observational study
Source: Springer Nature journal article supplement (doi:10.1186/s12882-017-0711-6), 2017-09-08
Supplement: MOESM2 [file 15032052]

## Factors associated with foot ulceration and amputation in adults on dialysis: a cross-sectional observational study

Michelle R Kaminski, Anita Raspovic, Lawrence P McMahon, Katrina A Lambert, Bircan Erbas, Peter F Mount, Peter G Kerr, Karl B Landorf

### Additional File 2 Risk factors and potential confounding variables

| Continuous variables                                                                                                                                                                                                                                                                                                                                                                                                                                                                                                                                                                                                                                                                                                                                                                                                                                   | Categorical variables                                                                                                                                                                                                                                                                                                                                                                                                                                                                                                                                                                                                                                                                                                                                                                                                                                                                                                                                                                                                                                                                                                                                                                                                                                                            |
|--------------------------------------------------------------------------------------------------------------------------------------------------------------------------------------------------------------------------------------------------------------------------------------------------------------------------------------------------------------------------------------------------------------------------------------------------------------------------------------------------------------------------------------------------------------------------------------------------------------------------------------------------------------------------------------------------------------------------------------------------------------------------------------------------------------------------------------------------------|----------------------------------------------------------------------------------------------------------------------------------------------------------------------------------------------------------------------------------------------------------------------------------------------------------------------------------------------------------------------------------------------------------------------------------------------------------------------------------------------------------------------------------------------------------------------------------------------------------------------------------------------------------------------------------------------------------------------------------------------------------------------------------------------------------------------------------------------------------------------------------------------------------------------------------------------------------------------------------------------------------------------------------------------------------------------------------------------------------------------------------------------------------------------------------------------------------------------------------------------------------------------------------|
| Participant characteristics <ul style="list-style-type: none"> <li>• <b>Age</b></li> <li>• <b>Body mass index</b></li> </ul> Health-related quality of life (SF-36v2®) <ul style="list-style-type: none"> <li>• Physical Component Score</li> <li>• Mental Component Score</li> </ul> Comorbidities <ul style="list-style-type: none"> <li>• <b>Duration of diabetes</b></li> </ul> Dialysis-related variables <ul style="list-style-type: none"> <li>• <b>Duration of dialysis</b></li> </ul> Laboratory blood tests <ul style="list-style-type: none"> <li>• C-reactive protein</li> <li>• Serum albumin</li> <li>• Total calcium</li> <li>• Serum phosphate</li> <li>• Parathyroid hormone</li> <li>• Glycated hemoglobin (HbA1c)</li> <li>• Hemoglobin</li> </ul> Other <ul style="list-style-type: none"> <li>• Peak plantar pressures</li> </ul> | Participant characteristics <ul style="list-style-type: none"> <li>• <b>Male sex</b></li> <li>• <b>Current smoker</b></li> <li>• <b>Living alone</b></li> </ul> Comorbidities <ul style="list-style-type: none"> <li>• <b>Diabetes mellitus</b></li> <li>• <b>Retinopathy</b></li> <li>• <b>Peripheral neuropathy</b></li> <li>• <b>Peripheral arterial disease</b></li> <li>• <b>Arterial calcification</b></li> <li>• <b>Hypertension</b></li> <li>• <b>Dyslipidemia</b></li> <li>• <b>Ischemic heart disease</b></li> <li>• <b>Congestive cardiac failure</b></li> <li>• <b>Cerebrovascular disease</b></li> <li>• Osteoarthritis</li> <li>• Inflammatory arthritis</li> </ul> Lower extremity complications <ul style="list-style-type: none"> <li>• <b>Previous foot ulceration</b></li> <li>• <b>Current foot ulcer present at baseline</b></li> <li>• <b>Previous lower extremity amputation</b></li> </ul> Other <ul style="list-style-type: none"> <li>• Reduced range of motion of the 1<sup>st</sup> metatarsophalangeal joint</li> <li>• <b>Foot deformity</b></li> <li>• <b>Inappropriate/ill-fitting footwear</b></li> <li>• Skin pathology</li> <li>• Nail pathology</li> <li>• Poor foot health care behaviors</li> <li>• Regular podiatry attendance</li> </ul> |

Potential confounding variables that were considered in the regression models are boldface.

The above table is sourced from:

**Kaminski MR, Raspovic A, McMahon LP, Erbas B, Landorf KB.** Risk factors for foot ulceration in adults with end-stage renal disease on dialysis: study protocol for a prospective observational cohort study. *J Foot Ankle Res.* 2015 Sep; 8:53.

© 2015 Kaminski et al. **Open Access** This article is distributed under the terms of the Creative Commons Attribution 4.0 International License (<http://creativecommons.org/licenses/by/4.0/>), which permits unrestricted use, distribution, and reproduction in any medium, provided you give appropriate credit to the original author(s) and the source, provide a link to the Creative Commons license, and indicate if changes were made. The Creative Commons Public Domain Dedication waiver (<http://creativecommons.org/publicdomain/zero/1.0/>) applies to the data made available in this article, unless otherwise stated.
