# Supplementary material for: Factors associated with foot ulceration and amputation in adults on dialysis: a cross-sectional observational study
Source: Springer Nature journal article supplement (doi:10.1186/s12882-017-0711-6), 2017-09-08
Supplement: MOESM3 [file 15032052]

## Factors associated with foot ulceration and amputation in adults on dialysis: a cross-sectional observational study

Michelle R Kaminski, Anita Raspovic, Lawrence P McMahon, Katrina A Lambert, Bircan Erbas, Peter F Mount, Peter G Kerr, Karl B Landorf

### Additional File 3 Characteristics of current foot ulcers and amputations

#### Additional Table 1 Characteristics of current foot ulcers – data are total number of foot ulcers (%), unless otherwise specified

|                                      | Total foot ulcers       | Left foot ulcers        | Right foot ulcers       |
|--------------------------------------|-------------------------|-------------------------|-------------------------|
| Total number of foot ulcers          | 68 (100.0)              | 28 (41.2)               | 40 (58.8)               |
| Number of foot ulcers/participant    |                         |                         |                         |
| Mean (SD), Range                     | 1.51 (0.89), 1.0 to 5.0 | 1.27 (0.55), 1.0 to 3.0 | 1.38 (0.86), 1.0 to 5.0 |
| Median (IQR)                         | 1.0 (1.0 to 2.0)        | 1.0 (1.0 to 1.0)        | 1.0 (1.0 to 1.0)        |
| Location                             |                         |                         |                         |
| Toes (dorsal, lateral or medial)     | 36 (52.9)               | 15 (53.6)               | 21 (52.5)               |
| Plantar toes, forefoot and midfoot   | 16 (23.5)               | 5 (17.9)                | 11 (27.5)               |
| Dorsal foot                          | 8 (11.8)                | 5 (17.9)                | 3 (7.5)                 |
| Heel                                 | 8 (11.8)                | 3 (10.7)                | 5 (12.5)                |
| Type                                 |                         |                         |                         |
| Neuropathic                          | 8 (11.8)                | 2 (7.1)                 | 6 (15.0)                |
| Neuro-ischemic                       | 47 (69.1)               | 18 (64.3)               | 29 (72.5)               |
| Ischemic                             | 4 (5.9)                 | 4 (14.3)                | 0 (0)                   |
| Other                                | 9 (13.2)                | 4 (14.3)                | 5 (12.5)                |
| Median duration (IQR), <i>months</i> | 3.0 (1.2 to 6.0)        | 2.5 (1.0 to 5.0)        | 3.0 (1.8 to 6.5)        |

SD = Standard deviation. IQR = Interquartile range.

#### Additional Table 2 Characteristics of amputations – data are total number of amputations (%), unless otherwise specified

|                                   | Total amputations       | Left amputations        | Right amputations       |
|-----------------------------------|-------------------------|-------------------------|-------------------------|
| Total number of amputations       | 79 (100.0)              | 49 (62.0)               | 30 (38.0)               |
| Number of amputations/participant |                         |                         |                         |
| Mean (SD), Range                  | 1.72 (0.94), 1.0 to 4.0 | 1.48 (0.76), 1.0 to 4.0 | 1.25 (0.68), 1.0 to 4.0 |
| Median (IQR)                      | 1.0 (1.0 to 2.0)        | 1.0 (1.0 to 2.0)        | 1.0 (1.0 to 1.0)        |
| Minor                             | 66 (83.5)               | 40 (81.6)               | 26 (86.7)               |
| Toe                               | 54 (81.8)               | 36 (90.0)               | 18 (69.2)               |
| Partial toe                       | 1 (1.5)                 | 0 (0)                   | 1 (3.8)                 |
| Metatarsal                        | 1 (1.5)                 | 0 (0)                   | 1 (3.8)                 |
| Transmetatarsal                   | 10 (15.2)               | 4 (10.0)                | 6 (23.1)                |
| Major                             | 13 (16.5)               | 9 (18.4)                | 4 (13.3)                |
| Below knee amputation             | 13 (100)                | 9 (100)                 | 4 (100)                 |
| Above knee amputation             | 0 (0)                   | 0 (0)                   | 0 (0)                   |

SD = Standard deviation. IQR = Interquartile range.
