# Supplementary material for: Factors associated with foot ulceration and amputation in adults on dialysis: a cross-sectional observational study
Source: Springer Nature journal article supplement (doi:10.1186/s12882-017-0711-6), 2017-09-08
Supplement: MOESM5 [file 15032052]

## Factors associated with foot ulceration and amputation in adults on dialysis: a cross-sectional observational study

Michelle R Kaminski, Anita Raspovic, Lawrence P McMahon, Katrina A Lambert, Bircan Erbas, Peter F Mount, Peter G Kerr, Karl B Landorf

### Additional File 5 Individual health-related quality of life, foot assessment, and foot-health care behavior results for participants *with* and *without* foot ulceration and/or amputation

The following tables included in this additional file present the data in its entirety before the data were categorized for statistical analysis (presented in Table 2 of journal article).

#### Additional Table 1 Health-related quality of life (SF-36v2<sup>®</sup>) – data are mean (SD)

|                          |                      | Total<br>(n = 450) | Foot ulceration |                 | Lower extremity amputation |                 |
|--------------------------|----------------------|--------------------|-----------------|-----------------|----------------------------|-----------------|
|                          |                      |                    | Yes<br>(n = 45) | No<br>(n = 405) | Yes<br>(n = 46)            | No<br>(n = 404) |
| Physical component score | Physical functioning | 36.00 (11.34)      | 30.28 (10.47)   | 36.64 (11.27)   | 29.50 (9.68)               | 36.75 (11.29)   |
|                          | Role physical        | 40.44 (11.64)      | 36.40 (11.54)   | 40.89 (11.59)   | 37.73 (11.87)              | 40.75 (11.60)   |
|                          | Bodily pain          | 46.39 (13.40)      | 41.35 (13.43)   | 46.95 (13.29)   | 43.87 (15.18)              | 46.68 (13.17)   |
|                          | General health       | 39.87 (10.90)      | 37.41 (11.21)   | 40.15 (10.85)   | 35.40 (11.39)              | 40.38 (10.74)   |
| Mental component score   | Vitality             | 43.47 (10.79)      | 40.65 (11.07)   | 43.78 (10.73)   | 41.10 (10.59)              | 43.74 (10.80)   |
|                          | Social functioning   | 42.40 (14.03)      | 39.51 (15.17)   | 42.72 (13.88)   | 36.74 (16.21)              | 43.04 (13.63)   |
|                          | Role emotional       | 45.19 (11.76)      | 41.78 (15.13)   | 45.57 (11.28)   | 43.30 (14.02)              | 45.40 (11.47)   |
|                          | Mental health        | 48.58 (10.83)      | 46.74 (11.33)   | 48.79 (10.77)   | 47.17 (12.07)              | 48.74 (10.69)   |

SF-36v2<sup>®</sup> = Short-Form-36 version 2.0.

**Additional Table 2 Foot assessment – data are *n* (%), unless otherwise stated**

|                                              |                                                    | Total<br>(n = 450) | Foot ulceration |                 | Lower extremity amputation |                 |
|----------------------------------------------|----------------------------------------------------|--------------------|-----------------|-----------------|----------------------------|-----------------|
|                                              |                                                    |                    | Yes<br>(n = 45) | No<br>(n = 405) | Yes<br>(n = 46)            | No<br>(n = 404) |
| Peripheral neuropathy                        | <i>Mean vibration perception threshold (SD), V</i> |                    |                 |                 |                            |                 |
|                                              | Left foot*                                         | 20.0 (11.9)        | 31.1 (11.5)     | 19.1 (11.5)     | 30.2 (11.0)                | 19.3 (11.7)     |
|                                              | Right foot*                                        | 19.1 (11.6)        | 30.0 (10.8)     | 18.3 (11.3)     | 28.8 (10.6)                | 18.4 (11.4)     |
|                                              | <i>Vibration &gt;50 V left or right foot</i>       | 37 (8.2)           | 18 (40.0)       | 19 (4.7)        | 19 (41.3)                  | 18 (4.5)        |
|                                              | <i>Protective sensation</i>                        |                    |                 |                 |                            |                 |
|                                              | Left foot*                                         |                    |                 |                 |                            |                 |
|                                              | 0/3                                                | 78 (17.3)          | 24 (53.3)       | 54 (13.3)       | 28 (60.9)                  | 50 (12.4)       |
|                                              | 1/3                                                | 34 (7.6)           | 5 (11.1)        | 29 (7.2)        | 3 (6.5)                    | 31 (7.7)        |
|                                              | 2/3                                                | 49 (10.9)          | 4 (8.9)         | 45 (11.1)       | 4 (8.7)                    | 45 (11.1)       |
|                                              | 3/3                                                | 280 (62.2)         | 6 (13.3)        | 274 (67.7)      | 2 (4.3)                    | 278 (68.8)      |
|                                              | Right foot*                                        |                    |                 |                 |                            |                 |
|                                              | 0/3                                                | 77 (17.1)          | 27 (60.0)       | 50 (12.3)       | 30 (65.2)                  | 47 (11.6)       |
|                                              | 1/3                                                | 31 (6.9)           | 5 (11.1)        | 26 (6.4)        | 2 (4.3)                    | 29 (7.2)        |
|                                              | 2/3                                                | 61 (13.6)          | 6 (13.3)        | 55 (13.6)       | 8 (17.4)                   | 53 (13.1)       |
| 3/3                                          | 277 (61.6)                                         | 5 (11.1)           | 272 (67.2)      | 2 (4.3)         | 275 (68.1)                 |                 |
| Peripheral arterial disease                  | <i>Pedal pulses</i>                                |                    |                 |                 |                            |                 |
|                                              | Left foot*                                         |                    |                 |                 |                            |                 |
|                                              | 0/2                                                | 59 (13.1)          | 20 (44.4)       | 39 (9.6)        | 16 (34.8)                  | 43 (10.6)       |
|                                              | 1/2                                                | 87 (19.3)          | 13 (28.9)       | 74 (18.3)       | 10 (21.7)                  | 77 (19.1)       |
|                                              | 2/2                                                | 295 (65.6)         | 6 (13.3)        | 289 (71.4)      | 11 (23.9)                  | 284 (70.3)      |
|                                              | Right foot*                                        |                    |                 |                 |                            |                 |
|                                              | 0/2                                                | 60 (13.3)          | 24 (53.3)       | 36 (8.9)        | 18 (39.1)                  | 42 (10.4)       |
|                                              | 1/2                                                | 84 (18.7)          | 11 (24.4)       | 73 (18.0)       | 9 (19.6)                   | 75 (18.6)       |
|                                              | 2/2                                                | 302 (67.1)         | 8 (17.8)        | 294 (72.6)      | 15 (32.6)                  | 287 (71.0)      |
|                                              | <i>Mean ankle-brachial pressure index (SD)</i>     |                    |                 |                 |                            |                 |
|                                              | Left foot*                                         | 1.12 (0.27)        | 0.90 (0.33)     | 1.13 (0.25)     | 1.00 (0.41)                | 1.12 (0.25)     |
| Right foot*                                  | 1.15 (0.28)                                        | 1.11 (0.37)        | 1.14 (0.27)     | 1.11 (0.38)     | 1.15 (0.27)                |                 |
| <i>Mean toe-brachial pressure index (SD)</i> |                                                    |                    |                 |                 |                            |                 |
| Left foot*                                   | 0.70 (0.26)                                        | 0.56 (0.31)        | 0.71 (0.26)     | 0.62 (0.30)     | 0.70 (0.26)                |                 |
| Right foot*                                  | 0.72 (0.25)                                        | 0.52 (0.21)        | 0.73 (0.25)     | 0.57 (0.22)     | 0.73 (0.25)                |                 |
| Foot deformity                               | Hammer/claw toes                                   | 212 (47.1)         | 27 (60.0)       | 185 (45.7)      | 28 (60.9)                  | 184 (45.5)      |
|                                              | Hallux abducto valgus                              | 265 (58.9)         | 26 (57.8)       | 239 (59.0)      | 21 (45.7)                  | 244 (60.4)      |
|                                              | Stage 1                                            | 27 (10.2)          | 0 (0)           | 27 (11.3)       | 1 (4.8)                    | 26 (10.7)       |

|                                       |                                                       |             |             |             |             |             |
|---------------------------------------|-------------------------------------------------------|-------------|-------------|-------------|-------------|-------------|
|                                       | Stage 2                                               | 132 (49.8)  | 15 (57.7)   | 117 (49.0)  | 16 (76.2)   | 116 (47.5)  |
|                                       | Stage 3                                               | 88 (33.2)   | 7 (26.9)    | 81 (33.9)   | 2 (9.5)     | 86 (35.2)   |
|                                       | Stage 4                                               | 18 (6.8)    | 4 (15.4)    | 14 (5.9)    | 2 (9.5)     | 16 (6.5)    |
|                                       | Bony prominences                                      | 50 (11.1)   | 14 (31.1)   | 36 (8.9)    | 16 (34.8)   | 34 (8.4)    |
|                                       | Charcot neuroarthropathy                              | 16 (3.6)    | 5 (11.1)    | 11 (2.7)    | 11 (23.9)   | 5 (1.2)     |
|                                       | Other                                                 | 122 (27.1)  | 23 (51.1)   | 99 (24.4)   | 28 (60.9)   | 94 (23.3)   |
| Limited range of motion of first MTPJ | <i>Mean dorsiflexion of first MTPJ (SD), degrees</i>  |             |             |             |             |             |
|                                       | Left foot*                                            | 36.0 (14.0) | 28.9 (11.2) | 36.5 (14.1) | 26.4 (9.9)  | 36.5 (14.0) |
|                                       | Right foot*                                           | 34.6 (14.8) | 26.3 (12.3) | 35.4 (14.7) | 24.2 (11.7) | 35.5 (14.7) |
| Peak plantar pressures                | <i>Mean total left foot (SD), kg/cm<sup>2</sup>*</i>  | 1.85 (0.57) | 2.05 (0.53) | 1.84 (0.57) | 2.06 (0.37) | 1.84 (0.58) |
|                                       | <i>Mean total right foot (SD), kg/cm<sup>2</sup>*</i> | 1.87 (0.61) | 2.13 (0.55) | 1.85 (0.61) | 2.13 (0.50) | 1.86 (0.61) |
| Footwear                              | <i>Length</i>                                         |             |             |             |             |             |
|                                       | Good                                                  | 336 (74.7)  | 36 (80.0)   | 300 (74.1)  | 35 (76.1)   | 301 (74.5)  |
|                                       | Too short                                             | 80 (17.8)   | 4 (8.9)     | 76 (18.8)   | 6 (13.0)    | 74 (18.3)   |
|                                       | Too long                                              | 34 (7.6)    | 5 (11.1)    | 29 (7.2)    | 5 (10.9)    | 29 (7.2)    |
|                                       | <i>Width</i>                                          |             |             |             |             |             |
|                                       | Good                                                  | 344 (76.4)  | 39 (86.7)   | 305 (75.3)  | 39 (84.8)   | 305 (75.5)  |
|                                       | Too narrow                                            | 105 (23.3)  | 6 (13.3)    | 99 (24.4)   | 7 (15.2)    | 98 (24.3)   |
|                                       | Too wide                                              | 1 (0.2)     | 0 (0)       | 1 (0.2)     | 0 (0)       | 1 (0.2)     |
|                                       | <i>Depth</i>                                          |             |             |             |             |             |
|                                       | Good                                                  | 336 (74.7)  | 36 (80.0)   | 300 (74.1)  | 40 (87.0)   | 296 (73.3)  |
|                                       | Too shallow                                           | 114 (25.3)  | 9 (20.0)    | 105 (25.9)  | 6 (13.0)    | 108 (26.7)  |
|                                       | <i>Fixation</i>                                       |             |             |             |             |             |
|                                       | None                                                  | 202 (44.9)  | 14 (31.1)   | 188 (46.4)  | 11 (23.9)   | 191 (47.3)  |
|                                       | Laces                                                 | 145 (32.2)  | 11 (24.4)   | 134 (33.1)  | 16 (34.8)   | 129 (31.9)  |
|                                       | Velcro                                                | 76 (16.9)   | 19 (42.2)   | 57 (14.1)   | 17 (37.0)   | 59 (14.6)   |
|                                       | Straps/buckles                                        | 19 (4.2)    | 0 (0)       | 19 (4.7)    | 2 (4.3)     | 17 (4.2)    |
|                                       | Zips                                                  | 8 (1.8)     | 1 (2.2)     | 7 (1.7)     | 0 (0)       | 8 (2.0)     |
|                                       | <i>Forefoot sole flexion point</i>                    |             |             |             |             |             |
|                                       | At level of MTPJs                                     | 406 (90.2)  | 38 (84.4)   | 368 (90.9)  | 41 (89.1)   | 365 (90.3)  |
|                                       | Proximal to first MTPJ                                | 24 (5.3)    | 4 (8.9)     | 20 (4.9)    | 2 (4.3)     | 22 (5.4)    |
|                                       | Distal to first MTPJ                                  | 20 (4.4)    | 3 (6.7)     | 17 (4.2)    | 3 (6.5)     | 17 (4.2)    |
|                                       | <i>Heel height</i>                                    |             |             |             |             |             |
|                                       | 0-2.5 cm                                              | 426 (94.7)  | 43 (95.6)   | 383 (94.6)  | 45 (97.8)   | 381 (94.3)  |
|                                       | 2.6-5.0 cm                                            | 14 (3.1)    | 0 (0)       | 14 (3.5)    | 1 (2.2)     | 13 (3.2)    |
|                                       | >5.0 cm                                               | 10 (2.2)    | 2 (4.4)     | 8 (2.0)     | 0 (0)       | 10 (2.5)    |
|                                       | <i>Materials</i>                                      |             |             |             |             |             |
|                                       | Leather                                               | 128 (28.4)  | 15 (33.3)   | 113 (27.9)  | 15 (32.6)   | 113 (28.0)  |

|                |                       |            |           |            |           |            |
|----------------|-----------------------|------------|-----------|------------|-----------|------------|
|                | Synthetic             | 265 (58.9) | 23 (51.1) | 242 (59.8) | 25 (54.3) | 240 (59.4) |
|                | Mesh                  | 54 (12.0)  | 5 (11.1)  | 49 (12.1)  | 5 (10.9)  | 49 (12.1)  |
|                | Other                 | 3 (0.7)    | 2 (4.4)   | 1 (0.2)    | 1 (2.2)   | 2 (0.5)    |
|                | <i>Footwear style</i> |            |           |            |           |            |
|                | Walking shoe          | 68 (15.1)  | 3 (6.7)   | 65 (16.0)  | 4 (8.7)   | 64 (15.8)  |
|                | Boot                  | 13 (2.9)   | 1 (2.2)   | 12 (3.0)   | 2 (4.3)   | 11 (2.7)   |
|                | Slipper               | 22 (4.9)   | 6 (13.3)  | 16 (4.0)   | 4 (8.7)   | 18 (4.5)   |
|                | Sandal                | 31 (6.9)   | 1 (2.2)   | 30 (7.4)   | 2 (4.3)   | 29 (7.2)   |
|                | Athletic shoe         | 61 (13.6)  | 5 (11.1)  | 56 (13.8)  | 8 (17.4)  | 53 (13.1)  |
|                | Ugg-boot              | 11 (2.4)   | 1 (2.2)   | 10 (2.5)   | 2 (4.3)   | 9 (2.2)    |
|                | Backless slipper      | 6 (1.3)    | 1 (2.2)   | 5 (1.2)    | 0 (0)     | 6 (1.5)    |
|                | Surgical/bespoke      | 16 (3.6)   | 12 (26.7) | 4 (1.0)    | 10 (21.7) | 6 (1.5)    |
|                | Oxford shoe           | 42 (9.3)   | 6 (13.3)  | 36 (8.9)   | 6 (13.0)  | 36 (8.9)   |
|                | High heel             | 2 (0.4)    | 1 (2.2)   | 1 (0.2)    | 0 (0)     | 2 (0.5)    |
|                | Court shoe            | 58 (12.9)  | 1 (2.2)   | 57 (14.1)  | 0 (0)     | 58 (14.4)  |
|                | Moccasin              | 7 (1.6)    | 2 (4.4)   | 5 (1.2)    | 1 (2.2)   | 6 (1.5)    |
|                | Thong/flip-flop       | 50 (11.1)  | 1 (2.2)   | 49 (12.1)  | 1 (2.2)   | 49 (12.1)  |
|                | Mule                  | 61 (13.6)  | 3 (6.7)   | 58 (14.3)  | 4 (8.7)   | 57 (14.1)  |
|                | Other                 | 2 (0.4)    | 1 (2.2)   | 1 (0.2)    | 2 (4.3)   | 0 (0)      |
|                | <i>Age of shoe</i>    |            |           |            |           |            |
|                | 0-6 months            | 126 (28.0) | 21 (46.7) | 105 (25.9) | 20 (43.5) | 106 (26.2) |
|                | 6-12 months           | 27 (6.0)   | 4 (8.9)   | 23 (5.7)   | 3 (6.5)   | 24 (5.9)   |
|                | >12 months            | 297 (66.0) | 20 (44.4) | 277 (68.4) | 23 (50.0) | 274 (67.8) |
| Skin pathology | Hyperkeratosis        | 307 (68.2) | 35 (77.8) | 272 (67.2) | 37 (80.4) | 270 (66.8) |
|                | Heloma dura           | 109 (24.2) | 7 (15.6)  | 102 (25.2) | 6 (13.0)  | 103 (25.5) |
|                | Uremic pruritus       | 106 (23.6) | 10 (22.2) | 96 (23.7)  | 5 (10.9)  | 101 (25.0) |
|                | Xerosis               | 202 (44.9) | 31 (68.9) | 171 (42.2) | 28 (60.9) | 174 (43.1) |
|                | Mild                  |            |           |            |           |            |
|                | 1                     | 115 (56.9) | 11 (35.5) | 104 (60.8) | 12 (42.9) | 103 (59.2) |
|                | 2                     | 57 (28.2)  | 9 (29.0)  | 48 (28.1)  | 9 (32.1)  | 48 (27.6)  |
|                | Moderate              |            |           |            |           |            |
|                | 3                     | 21 (10.4)  | 8 (25.8)  | 13 (7.6)   | 5 (17.9)  | 16 (9.2)   |
|                | 4                     | 8 (4.0)    | 3 (9.7)   | 5 (2.9)    | 2 (7.1)   | 6 (3.4)    |
|                | Severe                |            |           |            |           |            |
|                | 5                     | 1 (0.5)    | 0 (0)     | 1 (0.6)    | 0 (0)     | 1 (0.6)    |
|                | 6                     | 0 (0)      | 0 (0)     | 0 (0)      | 0 (0)     | 0 (0)      |
|                | Calciphylaxis         | 5 (1.1)    | 1 (2.2)   | 4 (1.0)    | 1 (2.2)   | 4 (1.0)    |
|                | Other                 | 55 (12.2)  | 6 (13.3)  | 49 (12.1)  | 6 (13.0)  | 49 (12.1)  |

|                |                    |            |           |            |           |            |
|----------------|--------------------|------------|-----------|------------|-----------|------------|
| Nail pathology | Half-and-half nail | 79 (17.6)  | 9 (20.0)  | 70 (17.3)  | 5 (10.9)  | 74 (18.3)  |
|                | Absent lunula      | 121 (26.9) | 8 (17.8)  | 113 (27.9) | 9 (19.6)  | 112 (27.7) |
|                | Onychomycosis      | 101 (22.4) | 17 (37.8) | 84 (20.7)  | 15 (32.6) | 86 (21.3)  |
|                | Onychocryptosis    | 3 (0.7)    | 0 (0)     | 3 (0.7)    | 0 (0)     | 3 (0.7)    |
|                | Onychauxis         | 121 (26.9) | 18 (40.0) | 103 (25.4) | 19 (41.3) | 102 (25.2) |
|                | Other              | 10 (2.2)   | 0 (0)     | 10 (2.5)   | 0 (0)     | 10 (2.5)   |

SD = Standard deviation. V = Volts. \*Maximum missing data were for ankle-brachial pressure index involving 79 participants missing overall (17.6%). Missing data were for vibration perception threshold (left, n = 36; right, n = 33), protective sensation (left, n = 9; right, n = 4), pedal pulses (left, n = 9; right, n = 4), ankle-brachial pressure index (n = 79), toe-brachial pressure index (left, n = 27; right, n = 26), limited range of motion of first MTPJ (left, n = 25; right, n = 15) and peak plantar pressures (left, n = 56; right, n = 55). MTPJ = Metatarsophalangeal joint.

**Additional Table 3 Foot-health care behaviors – data are *n* (%)**

|                                                                                           | Total<br>(n = 450) | Foot ulceration |                 | Lower extremity amputation |                 |
|-------------------------------------------------------------------------------------------|--------------------|-----------------|-----------------|----------------------------|-----------------|
|                                                                                           |                    | Yes<br>(n = 45) | No<br>(n = 405) | Yes<br>(n = 46)            | No<br>(n = 404) |
| <i>Question 1. Do you inspect your feet daily?</i>                                        |                    |                 |                 |                            |                 |
| Yes                                                                                       | 133 (29.6)         | 17 (37.8)       | 116 (28.6)      | 18 (39.1)                  | 115 (28.5)      |
| No                                                                                        | 317 (70.4)         | 28 (62.2)       | 289 (71.4)      | 28 (60.9)                  | 289 (71.5)      |
| <i>Question 2. Do you avoid walking barefoot?</i>                                         |                    |                 |                 |                            |                 |
| Yes                                                                                       | 231 (51.3)         | 30 (66.7)       | 201 (49.6)      | 32 (69.6)                  | 199 (49.3)      |
| No                                                                                        | 219 (48.7)         | 15 (33.3)       | 204 (50.4)      | 14 (30.4)                  | 205 (50.7)      |
| <i>Question 3. Are you able to reach your feet?</i>                                       |                    |                 |                 |                            |                 |
| Yes                                                                                       | 299 (66.4)         | 22 (48.9)       | 277 (68.4)      | 25 (54.3)                  | 274 (67.8)      |
| No                                                                                        | 151 (33.6)         | 23 (51.1)       | 128 (31.6)      | 21 (45.7)                  | 130 (32.2)      |
| <i>Question 4. Do you treat your own nails and skin lesions? (e.g. calluses or corns)</i> |                    |                 |                 |                            |                 |
| Yes                                                                                       | 205 (45.6)         | 5 (11.1)        | 200 (49.4)      | 7 (15.2)                   | 198 (49.0)      |
| No                                                                                        | 36 (8.0)           | 4 (8.9)         | 32 (7.9)        | 2 (4.3)                    | 34 (8.4)        |
| Podiatrist                                                                                | 209 (46.4)         | 36 (80.0)       | 173 (42.7)      | 37 (80.4)                  | 172 (42.6)      |
| <i>Question 5. Have you ever seen a podiatrist before?</i>                                |                    |                 |                 |                            |                 |
| Yes                                                                                       | 278 (61.8)         | 39 (86.7)       | 239 (59.0)      | 43 (93.5)                  | 235 (58.2)      |
| No                                                                                        | 172 (38.2)         | 6 (13.3)        | 166 (41.0)      | 3 (6.5)                    | 169 (41.8)      |
